# Supplementary material
Source: publisher site journal article supplement (https://www.spandidos-publications.com/428/downloadSupplementary)

Figure S1. Cytotoxic effects of TAX, VCR, COL and CIS on spindle Phyllodes cells in an *ex vivo* model. Tumor slices were treated with 2, 8 or 16  $\mu$ M of TAX, VCR, COL or CIS incubated for 72 h, and analyzed. The images show (A) Haemotoxylin an eosin stained sections of representative samples (n=3) at x20 magnification and (B) Ki-67 staining at 20x magnification. TAX, paclitaxel; VCR, vincristine; COL, colchicine; CIS, cisplatin.

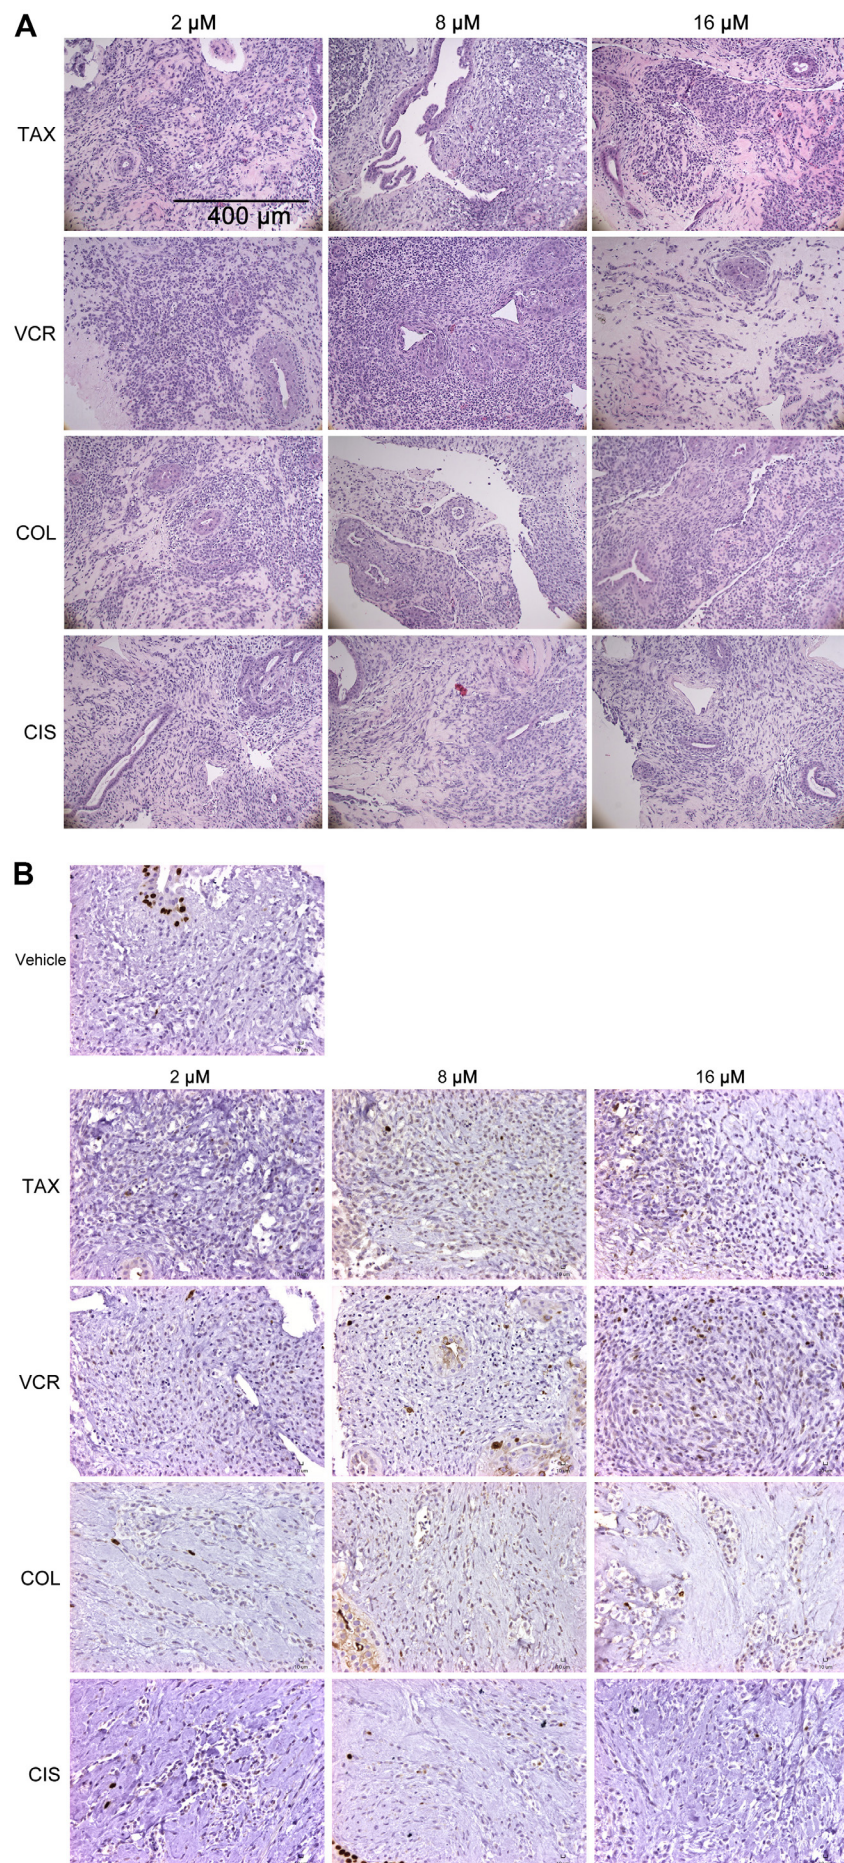

Supplement: Supplementary file 1 [file downloadSupplementary]
